# Supplementary material for: Catalase (CAT) Gene Family in Rapeseed (Brassica napus L.): Genome-Wide Analysis, Identification, and Expression Pattern in Response to Multiple Hormones and Abiotic Stress Conditions
Source: MDPI journal article supplement (doi:10.3390/ijms22084281), 2021-04-20
Supplement: s1 [file s1]

**Table S1.** The information of primer used in this study for gene expression analysis in qRT-PCR.

| <b>Gene ID</b>            | <b>Gene name</b> | <b>Forward primer</b>  | <b>Reverse primer</b>  |
|---------------------------|------------------|------------------------|------------------------|
| BnaA01T0032600ZS          | BnCAT1           | GCTTGCCTTCTGTCCTGCTA   | CGGTGTCTCTGAGTATCGGC   |
| BnaA03T0547900ZS          | BnCAT2           | GCTTGCCTTCTGTCCTGCTA   | GTCCAAGACGGTGTCTCTGG   |
| BnaA06T0144600ZS          | BnCAT3           | TTTCGACCCGCTTGATGTGA   | AGACCTGGGTTGAAAGCGAG   |
| BnaA07T0132000ZS          | BnCAT4           | GGCCTGAAGATGTCTTGCCT   | AGGAACCACAATAGCAGGGC   |
| BnaA07T0132100ZS          | BnCAT5           | TTCAAGCAGCCAGGAGACAG   | CCAGATGCTGCGGATCTCAT   |
| BnaA08T0131200ZS          | BnCAT6           | GCTAAATCCCTGAATCTCTCCA | GACGAAGAGGTGATAGACAGAG |
| BnaA08T0247000ZS          | BnCAT7           | AGCTTGCTTTCAACCCTGGT   | GATGTCTCTGCGTGTACCA    |
| BnaC03T0740800ZS          | BnCAT8           | CCTTATCTGACCCCCGCATC   | TGGTCTCACGTTTCAGATGGC  |
| BnaC05T0176000ZS          | BnCAT9           | CATCTCGTCCCTCACCATCG   | GATTCCTCTGGCGTGAACCA   |
| BnaC07T0194100ZS          | BnCAT10          | GCCGAACCCGAAAACAAACA   | GTGGACACCGAAACCTTCCA   |
| BnaC07T0524400ZS          | BnCAT11          | GCTAGAGGAGCCAGTGCAAA   | TCGGGACTTCCACGTTTCATG  |
| BnaC08T0260800ZS          | BnCAT12          | AGCTTGCTTTCAACCCTGGT   | CATTACAGGCAGCTGGAGA    |
| Bnascaffold0025T0038400ZS | BnCAT13          | TCTCCAGCTGCCTGTGAATG   | TAGGAACTTTCTCGGCGCAG   |
| Bnascaffold0026T0027200ZS | BnCAT14          | TTTCGACCCGCTTGATGTGA   | CACCACAAGACCAGGGTTGA   |
